# Supplementary material
Source: ML conference proceedings conference paper supplement (https://openreview.net/forum?id=hzND3ZEFg2)
Supplement: supplementary_material [file attachment]

## A Experiment Details

Due to the relatively small scale of human-human interactions to train our policies, we manually represent the state as a 64- dimensional vector of hand-crafted features. We use the same features as in Carroll et al. [6], which contains relative positions of the ego agent to: the other player, the closest onion/tomato, plate, soup, onion/tomato source, plate dispenser, serving location, and pot. The featurization also contains a boolean encoding of the agent’s orientation and whether the agent is adjacent to empty counters. Such featurization should enable more efficient learning of policies on the dataset.

**Latent strategy learning.** Note that while the human partner’s latent strategy  $\mathbf{z}$  influences the ego agent’s next state  $\mathbf{s}'$  together with their own state  $\mathbf{s}$  and action  $\mathbf{a}$ , the latent strategy  $\mathbf{z}$  may actually provide only a small amount of information in reconstructing the next state. Specifically, in *Overcooked*, the latent strategy  $\mathbf{z}$  only influences where the human is relative to the ego agent. Because of this, we propose a simpler learning framework for the encoder. Namely, instead of reconstructing the next state via  $d(\mathbf{s}'|\mathbf{s}, \mathbf{a}, \mathbf{z})$ , the latent strategy is only used to predict the human’s action via an alternative decoder  $\tilde{d}(\tilde{\mathbf{a}}|\mathbf{z})$ , where the human’s action  $\tilde{\mathbf{a}} \in \mathcal{A}$  can be easily inferred from taking the difference between  $\mathbf{s}'$  and  $\mathbf{s}$ .

The input to the encoder are a sequence of the previous 4 states observed by the ego agent. The encoder is parameterized as an LSTM with hidden dimension 256. The output of the LSTM is fed through a fully-connected layer to generated an 8-dimensional vector. Then, the decoder is simply parameterized as a 2-layer MLP with hidden dimension 16, whose output is a distribution over the 6 actions the human could take.

**Policy learning.** We parameterize the Q-function as a 3-layer fully-connected MLP with hidden dimension 256. The output of the policy is a 6-dimensional vector containing the Q-values for each of the 6 actions. Since the action space is discrete, the policy is simply choosing the action with the maximum Q-value, *i.e.*,  $\pi(\mathbf{a} | \mathbf{s}) = \mathbb{I}\{\mathbf{a} = \max_{\mathbf{a}'} Q(\mathbf{s}, \mathbf{a}')\}$  We use CQL [18] to train our Q-function.

$$\begin{aligned} \hat{Q}^{k+1} = & \arg \min_Q \mathbb{E}_{\mathbf{s}, \mathbf{a}, h \sim \mathcal{D}} \left[ \left( Q(\mathbf{s}, \mathbf{a}, \mathbf{z}) - \hat{B}^{\hat{\pi}^k} \hat{Q}^k(\mathbf{s}, \mathbf{a}, \mathbf{z}) \right)^2 \right] + \\ & \alpha \left( \mathbb{E}_{\substack{\mathbf{s}, h \sim \mathcal{D} \\ \mathbf{z} \sim f(\mathbf{z}|h)}} \left[ \log \sum_{\mathbf{a}} \exp(Q(\mathbf{s}, \mathbf{a}, \mathbf{z})) \right] - \mathbb{E}_{\substack{\mathbf{s}, \mathbf{a}, h \sim \mathcal{D} \\ \mathbf{z} \sim f(\mathbf{z}|h)}} [Q(\mathbf{s}, \mathbf{a}, \mathbf{z})] \right) \\ \hat{\pi}^{k+1} = & \arg \max_{\pi} \mathbb{E}_{\substack{\mathbf{s}, h \sim \mathcal{D} \\ \mathbf{z} \sim f(\mathbf{z}|h), \\ \mathbf{a} \sim \pi_k(\mathbf{a}|\mathbf{s}, \mathbf{z})}} \left[ \hat{Q}^{k+1}(\mathbf{s}, \mathbf{a}, \mathbf{z}) \right]. \end{aligned} \quad (2)$$

**Hyperparameters.** We use the hyperparameters reported in Table 1 across all layouts.

| Hyperparameter                  | Setting (for all layouts) |
|---------------------------------|---------------------------|
| Discount factor                 | 0.99                      |
| Batch size                      | 256                       |
| Target network update period    | every 500 updates         |
| Number of updates per iteration | 200                       |
| Number of iterations            | 100                       |
| Learning rate                   | 3e-4                      |

Table 1: Hyperparameters used during training.
